# Supplementary material
Source: bioRxiv or medRxiv preprint supplement (https://www.medrxiv.org/highwire/filestream/80022/field_highwire_adjunct_files/3/2020.05.05.20092098-4.pdf)

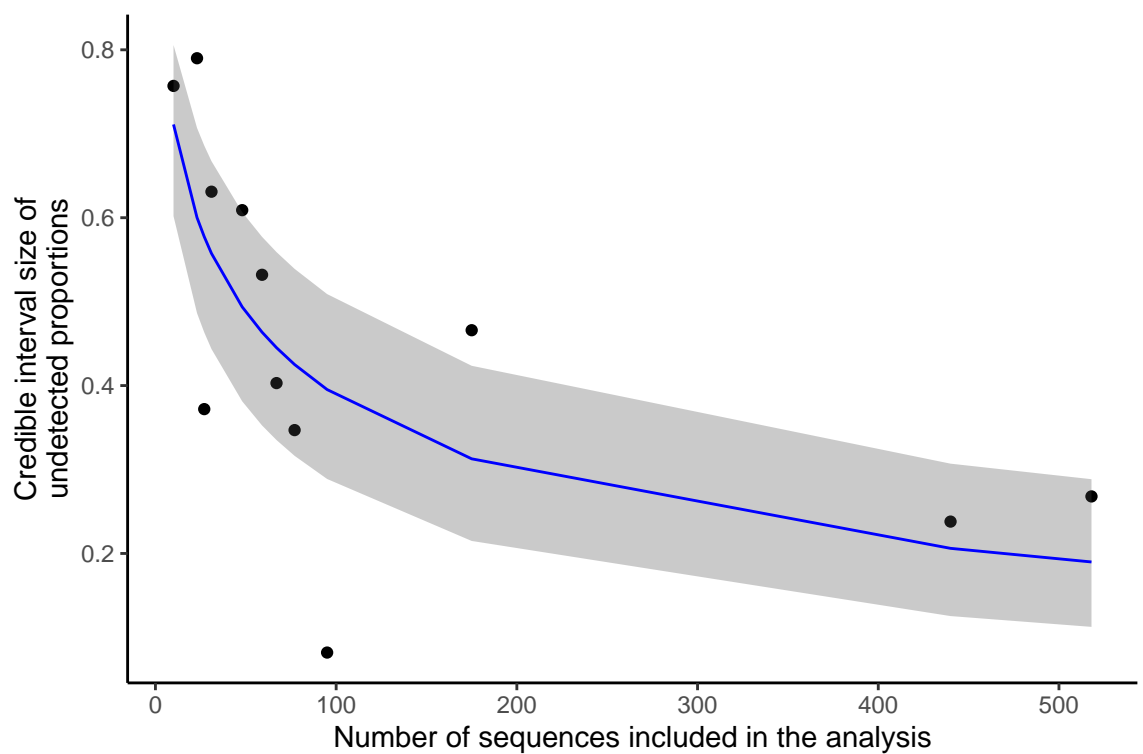

Supplement: Supplementary file [file 2020.05.05.20092098-4.pdf]
